# Supplementary material for: Hydrogen sulphide alleviates Fusarium Head Blight in wheat seedlings
Source: PeerJ. 2022 Mar 7;10:e13078. doi: 10.7717/peerj.13078 (PMC8908893; doi:10.7717/peerj.13078)
Supplement: Supplemental Information 5 [file peerj-10-13078-s005.xlsx]

## Sheet: Sheet1
H2S standard curve	（um）
0	0
1.89833	50
2.43743	75
3.28473	100
	y = 30.526x - 1.9053
figure.1
FHB	OD(0.29g)
0	0.09052	H2S content mol10-6/g FW=(OD*30.526-1.96053)*3.4
0	0.09535
0	0.09571
12	0.13056
12	0.1638
12	0.17309
24	0.16976
24	0.16104
24	0.17718
36	0.13356
36	0.13235
36	0.12786
48	0.12621
48	0.12895
48	0.12512
96	0.11296
96	0.11293
96	0.11266
CK
0	0.08741
0	0.09052
0	0.09571
12	0.11824
12	0.1049
12	0.11048
24	0.13504
24	0.13196
24	0.132919
36	0.13505
36	0.13253
36	0.12439
48	0.13453
48	0.13319
48	0.14642
96	0.13479
96	0.12155
96	0.14471
figure.3b			figure.3a	Disease Score
NaHS	OD(0.2g)	H2S content mol10-6/g FW=(OD*30.526-1.96053)*5	CK	33.5
0'	0.12603		CK	36
0'	0.12122		CK	41.8
0'	0.12754		NaHS	7.1
6'/0	0.20275		NaHS	7.2
6'/0	0.19782		NaHS	7.5
6'/0	0.2019		NAHSO3	31.3
9	0.24843		NAHSO4	29.6
9	0.23444		NAHSO5	35.9
9	0.23327		NA2SO3	33.5
18	0.1509		NA2SO4	31.9
18	0.18573		NA2SO5	33.5
18	0.19444		NAAC	32.9
36	0.14984		NAAC	32.3
36	0.1564		NAAC	31.9
36	0.18814		NAHSO4	35.3
CK			NAHSO5	36
0'	0.12603		NAHSO6	32.4
0'	0.12122		NASO4	35
0'	0.12754		NASO5	34
6'/0	0.10312		NASO6	35.3
6'/0	0.12151
6'/0	0.1115
9	0.12441
9	0.12936
9	0.12555
18	0.13148
18	0.18871
18	0.1592
36	0.12776
36	0.13016
36	0.15
figure.2b
		Disease score				Disease score				Disease score				Disease score				Disease score
CK	1	0		0	1	30		0.1	1	21		0.3	1	2		0.5	1	2
	2	0			2	33			2	24			2	2			2	2
	3	0			3	39			3	27			3	2			3	3
	4	0			4	39			4	24			4	3			4	1
	5	0			5	42			5	30			5	15			5	3
	6	0			6	36			6	3			6	3			6	2
	7	0			7	36			7	18			7	9			7	3
	8	0			8	39			8	21			8	4			8	2
	9	0			9	42			9	12			9	2			9	2
	10	0			10	51			10	21			10	2			10	3
	11	0			11	45			11	21			11	2			11	3
	12	0			12	45			12	24			12	3			12	30
	13	0			13	48			13	16			13	2			13	6
	14	0			14	51			14	3			14	27			14	6
	15	0			15	54			15	6			15	3			15	4
CK	1	0		0	1	30		0.1	1	2		0.3	1	2		0.5	1	1
	2	0			2	30			2	15			2	4			2	3
	3	0			3	39			3	27			3	2			3	10
	4	0			4	36			4	12			4	10			4	2
	5	0			5	33			5	15			5	12			5	20
	6	0			6	30			6	21			6	2			6	15
	7	0			7	33			7	15			7	10			7	6
	8	0			8	30			8	8			8	10			8	2
	9	0			9	36			9	18			9	2			9	16
	10	0			10	30			10	18			10	3			10	9
	11	0			11	30			11	12			11	10			11	10
	12	0			12	30			12	2			12	9			12	3
	13	0			13	30			13	3			13	2			13	3
	14	0			14	36			14	2			14	2			14	3
	15	0			15	33			15	8			15	1			15	12
CK	1	0		0	1	45		0	1	21		0.3	1	2		0.5	1	1
	2	0			2	33			2	8			2	3			2	1
	3	0			3	30			3	18			3	8			3	3
	4	0			4	39			4	2			4	3			4	2
	5	0			5	42			5	2			5	1			5	2
	6	0			6	36			6	18			6	2			6	2
	7	0			7	36			7	2			7	9			7	2
	8	0			8	27			8	2			8	3			8	2
	9	0			9	27			9	3			9	12			9	2
	10	0			10	30			10	15			10	3			10	3
	11	0			11	30			11	21			11	6			11	2
	12	0			12	33			12	21			12	10			12	4
	13	0			13	33			13	27			13	6			13	2
	14	0			14	42			14	3			14	3			14	6
	15	0			15	33			15	12			15	2			15	10
figure.2c
Position	Sample Name	Gene Name	Cq
A1	FHB-1	Fg	15.53
A2	FHB-1	Fg	15.5
A3	FHB-1	Fg	15.64
A4	FHB-2	Fg	15.63
A5	FHB-2	Fg	15.63
A6	FHB-2	Fg	15.62
A7	FHB-3	Fg	15.63
A8	FHB-3	Fg	15.86
A9	FHB-3	Fg	15.69
B1	0-1	Fg	19.41
B2	0-1	Fg	19.47
B3	0-1	Fg	19.55
B7	0-3	Fg	19.36
B8	0-3	Fg	19.37
B9	0-3	Fg	19.37
B10	0-4	Fg	18.9
B11	0-4	Fg	18.88
B12	0-4	Fg	18.85
C1	T0.1-1	Fg	21.17
C2	T0.1-1	Fg	21.19
C3	T0.1-1	Fg	21.3
C4	T0.1-2	Fg	20.95
C5	T0.1-2	Fg	20.75
C6	T0.1-2	Fg	20.75
C10	T0.1-4	Fg	21.56
C11	T0.1-4	Fg	21.67
C12	T0.1-4	Fg	21.55
D1	T0.3-1	Fg	23.59
D2	T0.3-1	Fg	23.64
D3	T0.3-1	Fg	24.19
D4	T0.3-2	Fg	22.45
D5	T0.3-2	Fg	22.29
D6	T0.3-2	Fg	22.34
D7	T0.3-3	Fg	22.76
D8	T0.3-3	Fg	22.62
D9	T0.3-3	Fg	22.73
E1	T0.5-1	Fg	26.7
E2	T0.5-1	Fg	26.53
E3	T0.5-1	Fg	26.82
E4	T0.5-2	Fg	27.26
E5	T0.5-2	Fg	27.29
E6	T0.5-2	Fg	26.96
E7	T0.5-3	Fg	27.41
E8	T0.5-3	Fg	27.44
E9	T0.5-3	Fg	27.51
G1	CK-1	Fg	32.01
G2	CK-1	Fg	33.44
G3	CK-1	Fg	32.24
G4	CK-2	Fg	32.5
G5	CK-2	Fg	31.91
G6	CK-2	Fg	33.49
G7	CK-3	Fg	32.11
G8	CK-3	Fg	32.83
G9	CK-3	Fg	32.74
