# Supplementary material for: Hydrogen sulphide alleviates Fusarium Head Blight in wheat seedlings
Source: PeerJ. 2022 Mar 7;10:e13078. doi: 10.7717/peerj.13078 (PMC8908893; doi:10.7717/peerj.13078)
Supplement: Supplemental Information 6 [file peerj-10-13078-s006.xlsx]

## Sheet: Sheet1
figure.4a				figure.4b
standard	163 mmol/L	0.25649		standard	10nmol/L	0.12151
Blank		0.0035		Blank		-0.00231
CK	OD	H2O2mmol/gFW=(OD-0.0035)/0.25299*163/(0.1/0.9)		CK	OD	MDAnmol/gFW=(OD+0.00231)/0.12382*10/(0.1/0.9)
0'	0.06588			0'	0.0376
0'	0.06805			0'	0.03397
0'	0.06918			0'	0.03107
10'/4	0.08312			10'/4	0.04629
10'/4	0.08994			10'/4	0.03842
10'/4	0.09354			10'/4	0.04046
12	0.10094			12	0.04508
12	0.10515			12	0.04642
12	0.11174			12	0.04845
36	0.0949			36	0.04594
36	0.10058			36	0.04891
36	0.11277			36	0.04911
48	0.08892			48	0.04407
48	0.09146			48	0.04421
48	0.08636			48	0.04081
NaHS				NAHS
0'	0.06588			0'	0.0376
0'	0.06805			0'	0.03397
0'	0.06918			0'	0.03107
10'/4	0.06334			10'/4	0.0295
10'/4	0.06749			10'/4	0.02177
10'/4	0.06479			10'/4	0.02714
12	0.06167			12	0.03641
12	0.06378			12	0.03678
12	0.05754			12	0.03193
36	0.04778			36	0.02245
36	0.05103			36	0.02759
36	0.05484			36	0.02914
48	0.05736			48	0.02622
48	0.05138			48	0.02338
48	0.05286			48	0.02835
figure.5a					figure.5b
control	0.437
control blank	0.047
CK	OD
0'	0.245	0.048	SOD U/gFW=(0.39-(OD-0.048))/0.39*2*12*5/(0.1/0.9)		CK	OD1	OD2
0'	0.258	0.048			0'	0.98058	0.62177	POD U/gFW=(OD1-OD2)/12*20/30/0.1*1000
0'	0.238	0.048			0'	0.9288	0.57894
10'/4	0.259	0.048			0'	0.90265	0.55209
10'/4	0.231	0.048			10'/4	0.85884	0.48654
10'/4	0.245	0.048			10'/4	0.98064	0.56433
12	0.217	0.048			10'/4	0.9205	0.49621
12	0.238	0.048			12	0.87312	0.55073
12	0.204	0.048			12	0.94667	0.59952
36	0.179	0.048			12	0.87392	0.53625
36	0.181	0.048			36	0.98372	0.64263
36	0.179	0.048			36	0.9764	0.63781
48	0.15	0.048			36	1.06109	0.72746
48	0.153	0.048			48	0.98228	0.61121
48	0.16	0.048			48	0.96002	0.60844
72	0.178	0.048			48	0.97657	0.55091
72	0.185	0.048			72	0.96509	0.58528
72	0.165	0.048			72	0.87472	0.51961
NaHS					72	0.91111	0.51115
0'	0.245	0.048			NAHS
0'	0.258	0.048			0'	0.98058	0.62177
0'	0.238	0.048			0'	0.9288	0.57894
10'/4	0.212	0.048			0'	0.90265	0.55209
10'/4	0.207	0.048			10'/4	0.9988	0.60244
10'/4	0.205	0.048			10'/4	0.96903	0.53625
12	0.159	0.048			10'/4	0.96468	0.52677
12	0.135	0.048			12	1.01136	0.52871
12	0.152	0.048			12	0.94818	0.55412
36	0.132	0.048			12	0.96779	0.5414
36	0.134	0.048			36	1.05732	0.58808
36	0.13	0.048			36	1.04866	0.57417
48	0.107	0.048			36	0.96345	0.54747
48	0.082	0.048			48	0.92573	0.57473
48	0.086	0.048			48	0.98486	0.54443
72	0.159	0.048			48	1.03349	0.53553
72	0.163	0.048			72	0.90749	0.48283
72	0.17	0.048			72	0.98235	0.62186
					72	0.96602	0.57582
figure.5c					figure.5d
Blank	1.17776	1.16998	0.00778		Blank	0.99969
CK	OD1	OD2			CK	OD
0'	1.77572	1.31266	APX U/gFW=((OD1-OD2)-0.00778)*14.9		0'	0.90115	CAT U/gFW=(0.99969-OD)*271/0.05/60*10
0'	1.86626	1.40665			0'	0.94129
0'	1.76283	1.33067			0'	0.94758
10'/4	1.71582	1.34903			10'/4	0.89673
10'/4	1.67791	1.36564			10'/4	0.91794
10'/4	1.67243	1.30549			10'/4	0.89818
12	1.77376	1.39965			12	0.89599
12	1.86919	1.37813			12	0.9185
12	1.86239	1.44992			12	0.89932
36	1.83375	1.38956			36	0.87015
36	1.93007	1.3866			36	0.87813
36	1.79	1.30325			36	0.86394
48	1.66322	1.20215			48	0.84002
48	1.22094	0.78948			48	0.84052
48	1.60097	1.28345			48	0.81126
72	1.69324	1.42559			72	0.82111
72	1.33983	1.10013			72	0.85882
72	1.51176	1.22215			72	0.81065
NAHS					NAHS
0'	1.77572	1.31266			0'	0.90115
0'	1.86626	1.40665			0'	0.94129
0'	1.76283	1.33067			0'	0.94758
10'/4	1.77938	1.35815			10'/4	0.90501
10'/4	1.77767	1.36313			10'/4	0.89234
10'/4	1.81987	1.3652			10'/4	0.90775
12	1.83382	1.33439			12	0.90632
12	1.95091	1.43194			12	0.88738
12	1.80915	1.20291			12	0.90617
36	2.22617	1.5542			36	0.81438
36	2.00483	1.35849			36	0.8306
36	1.91408	1.34631			36	0.83774
48	1.67263	1.08135			48	0.79815
48	1.79634	1.28076			48	0.74489
48	1.62542	1.13684			48	0.75415
72	1.41542	1.20669			72	0.73733
72	1.47947	1.15487			72	0.68792
72	1.40419	1.2414			72	0.70432
