# Supplementary material for: Hydrogen sulphide alleviates Fusarium Head Blight in wheat seedlings
Source: PeerJ. 2022 Mar 7;10:e13078. doi: 10.7717/peerj.13078 (PMC8908893; doi:10.7717/peerj.13078)
Supplement: Supplemental Information 7 [file peerj-10-13078-s007.xlsx]

## Sheet: Sheet1
12h						24h						36h						48h
Position	Sample Name	Gene Name	Cq			Position	Sample Name	Gene Name	Cq			Position	Sample Name	Gene Name	Cq			Position	Sample Name	Gene Name	Cq
G1	CK-12-1	GAPDH	17.89			G1	CK-24-1	GAPDH	18.02			G1	CK-36-1	GAPDH	17.82			D10	CK-1	TaGAPDH	19
G3	CK-12-1	GAPDH	18.03			G2	CK-24-1	GAPDH	18.06			G2	CK-36-1	GAPDH	17.8			D11	CK-1	TaGAPDH	18.98
G2	CK-12-1	GAPDH	17.93			G3	CK-24-1	GAPDH	18.04			G3	CK-36-1	GAPDH	17.91			D12	CK-1	TaGAPDH	19.08
H1	CK-12-2	GAPDH	18.33			H1	CK-24-2	GAPDH	18.91			H1	CK-36-2	GAPDH	18.39			E10	CK-2	TaGAPDH	19.03
H2	CK-12-2	GAPDH	18.35			H2	CK-24-2	GAPDH	18.9			H2	CK-36-2	GAPDH	18.39			E11	CK-2	TaGAPDH	19
H3	CK-12-2	GAPDH	18.34			H3	CK-24-2	GAPDH	18.92			H3	CK-36-2	GAPDH	18.33			E12	CK-2	TaGAPDH	18.99
G4	CK-12-3	GAPDH	18.53			G4	CK-24-3	GAPDH	18.47			G4	CK-36-3	GAPDH	18.6			F10	CK-3	TaGAPDH	19.02
G6	CK-12-3	GAPDH	18.71			G5	CK-24-3	GAPDH	18.49			G5	CK-36-3	GAPDH	18.79			F11	CK-3	TaGAPDH	19.12
G5	CK-12-3	GAPDH	18.57			G6	CK-24-3	GAPDH	18.6			G6	CK-36-3	GAPDH	18.8			F12	CK-3	TaGAPDH	19.07
H4	H2S-12-1	GAPDH	17.87			H4	H2S-24-1	GAPDH	19.54			H4	H2S-36-1	GAPDH	17.46			A10	H2S-1	TaGAPDH	17.97
H5	H2S-12-1	GAPDH	17.91			H5	H2S-24-1	GAPDH	19.46			H5	H2S-36-1	GAPDH	17.4			A11	H2S-1	TaGAPDH	17.93
H6	H2S-12-1	GAPDH	18			H6	H2S-24-1	GAPDH	19.55			H6	H2S-36-1	GAPDH	17.71			A12	H2S-1	TaGAPDH	17.92
G7	H2S-12-2	GAPDH	19.58			G7	H2S-24-2	GAPDH	19.5			G7	H2S-36-2	GAPDH	17.85			B10	H2S-2	TaGAPDH	18.29
G8	H2S-12-2	GAPDH	19.54			G8	H2S-24-2	GAPDH	19.37			G8	H2S-36-2	GAPDH	17.77			B11	H2S-2	TaGAPDH	18.24
G9	H2S-12-2	GAPDH	19.43			G9	H2S-24-2	GAPDH	19.38			G9	H2S-36-2	GAPDH	17.78			B12	H2S-2	TaGAPDH	18.2
H7	H2S-12-3	GAPDH	18.01			H7	H2S-24-3	GAPDH	18.37			H7	H2S-36-3	GAPDH	19.46			C10	H2S-3	TaGAPDH	19.21
H8	H2S-12-3	GAPDH	17.83			H8	H2S-24-3	GAPDH	18.38			H8	H2S-36-3	GAPDH	19.29			C11	H2S-3	TaGAPDH	19.2
H9	H2S-12-3	GAPDH	17.86			H9	H2S-24-3	GAPDH	18.37			H9	H2S-36-3	GAPDH	19.26			C12	H2S-3	TaGAPDH	19.19
A10	CK-12-1	PR4	23.7			A10	CK-24-1	PR4	21.45			A10	CK-36-1	PR4	21.08			D7	CK-1	PR4	21.81
A11	CK-12-1	PR4	23.66			A11	CK-24-1	PR4	21.48			A11	CK-36-1	PR4	20.96			D8	CK-1	PR4	21.9
A12	CK-12-1	PR4	23.73			A12	CK-24-1	PR4	21.48			A12	CK-36-1	PR4	20.9			D9	CK-1	PR4	22
B10	CK-12-2	PR4	23.46			B10	CK-24-2	PR4	22.72			B10	CK-36-2	PR4	22.48			E7	CK-2	PR4	21.95
B11	CK-12-2	PR4	23.42			B11	CK-24-2	PR4	22.69			B11	CK-36-2	PR4	22.5			E8	CK-2	PR4	22.42
B12	CK-12-2	PR4	23.44			B12	CK-24-2	PR4	22.72			B12	CK-36-2	PR4	22.53			E9	CK-2	PR4	21.94
C10	CK-12-3	PR4	24.65			C10	CK-24-3	PR4	21.16			C10	CK-36-3	PR4	22.31			F7	CK-3	PR4	22
C11	CK-12-3	PR4	24.65			C11	CK-24-3	PR4	21.25			C11	CK-36-3	PR4	22.38			F8	CK-3	PR4	21.99
C12	CK-12-3	PR4	24.68			C12	CK-24-3	PR4	21.18			C12	CK-36-3	PR4	22.32			F9	CK-3	PR4	21.98
D10	H2S-12-1	PR4	22.55			D10	H2S-24-1	PR4	22.04			D10	H2S-36-1	PR4	20.53			A7	H2S-1	PR4	19.68
D11	H2S-12-1	PR4	22.66			D11	H2S-24-1	PR4	22.18			D11	H2S-36-1	PR4	20.54			A8	H2S-1	PR4	19.58
D12	H2S-12-1	PR4	22.47			D12	H2S-24-1	PR4	22.09			D12	H2S-36-1	PR4	20.75			A9	H2S-1	PR4	19.5
E10	H2S-12-2	PR4	24.42			E10	H2S-24-2	PR4	23.05			E10	H2S-36-2	PR4	21.79			B7	H2S-2	PR4	20.33
E11	H2S-12-2	PR4	24.52			E11	H2S-24-2	PR4	23.09			E11	H2S-36-2	PR4	21.83			B8	H2S-2	PR4	20.45
E12	H2S-12-2	PR4	24.46			E12	H2S-24-2	PR4	22.97			E12	H2S-36-2	PR4	21.87			B9	H2S-2	PR4	20.33
F10	H2S-12-3	PR4	22.92			F10	H2S-24-3	PR4	20.46			F10	H2S-36-3	PR4	22.81			C7	H2S-3	PR4	21.49
F11	H2S-12-3	PR4	23.04			F11	H2S-24-3	PR4	20.44			F11	H2S-36-3	PR4	22.89			C8	H2S-3	PR4	21.39
F12	H2S-12-3	PR4	22.99			F12	H2S-24-3	PR4	20.43			F12	H2S-36-3	PR4	22.86			C9	H2S-3	PR4	21.43
A7	CK-12-1	PR3	21.72			A7	CK-24-1	PR3	19.93			A7	CK-36-1	PR3	18.85			D4	CK-1	PR3	19.42
A8	CK-12-1	PR3	21.71			A8	CK-24-1	PR3	19.8			A8	CK-36-1	PR3	18.73			D5	CK-1	PR3	19.44
A9	CK-12-1	PR3	21.66			A9	CK-24-1	PR3	19.78			A9	CK-36-1	PR3	18.75			D6	CK-1	PR3	19.45
B7	CK-12-2	PR3	20.67			B7	CK-24-2	PR3	21.29			B7	CK-36-2	PR3	20.34			E4	CK-2	PR3	20.46
B8	CK-12-2	PR3	20.61			B8	CK-24-2	PR3	21.26			B8	CK-36-2	PR3	20.25			E5	CK-2	PR3	20.49
B9	CK-12-2	PR3	20.56			B9	CK-24-2	PR3	21.23			B9	CK-36-2	PR3	20.27			E6	CK-2	PR3	20.52
C7	CK-12-3	PR3	22.54			C7	CK-24-3	PR3	19.57			C7	CK-36-3	PR3	20.56			F4	CK-3	PR3	20.21
C8	CK-12-3	PR3	22.54			C8	CK-24-3	PR3	19.58			C8	CK-36-3	PR3	20.46			F5	CK-3	PR3	20.13
C9	CK-12-3	PR3	22.54			C9	CK-24-3	PR3	19.54			C9	CK-36-3	PR3	20.51			F6	CK-3	PR3	20.03
D7	H2S-12-1	PR3	20.01			D7	H2S-24-1	PR3	20.8			D7	H2S-36-1	PR3	17.66			A4	H2S-1	PR3	16.97
D8	H2S-12-1	PR3	20.08			D8	H2S-24-1	PR3	20.79			D8	H2S-36-1	PR3	17.68			A5	H2S-1	PR3	16.92
D9	H2S-12-1	PR3	20.06			D9	H2S-24-1	PR3	20.66			D9	H2S-36-1	PR3	17.74			A6	H2S-1	PR3	16.95
E7	H2S-12-2	PR3	20.08			E7	H2S-24-2	PR3	20.5			E7	H2S-36-2	PR3	18.96			B4	H2S-2	PR3	18.4
E8	H2S-12-2	PR3	20.05			E8	H2S-24-2	PR3	20.35			E8	H2S-36-2	PR3	18.83			B5	H2S-2	PR3	18.41
E9	H2S-12-2	PR3	20.03			E9	H2S-24-2	PR3	20.35			E9	H2S-36-2	PR3	18.82			B6	H2S-2	PR3	18.51
F7	H2S-12-3	PR3	20.34			F7	H2S-24-3	PR3	20.19			F7	H2S-36-3	PR3	19.48			C4	H2S-3	PR3	18.84
F8	H2S-12-3	PR3	20.21			F8	H2S-24-3	PR3	19.52			F8	H2S-36-3	PR3	19.42			C5	H2S-3	PR3	18.87
F9	H2S-12-3	PR3	20.14			F9	H2S-24-3	PR3	19.63			F9	H2S-36-3	PR3	19.52			C6	H2S-3	PR3	18.86
A4	CK-12-1	PR2	22.78			A4	CK-24-1	PR2	20.44			A4	CK-36-1	PR2	18.86			D1	CK-1	PR2	20.17
A5	CK-12-1	PR2	22.91			A5	CK-24-1	PR2	20.45			A5	CK-36-1	PR2	18.94			D2	CK-1	PR2	20.15
A6	CK-12-1	PR2	23.05			A6	CK-24-1	PR2	20.66			A6	CK-36-1	PR2	18.93			D3	CK-1	PR2	20.06
B4	CK-12-2	PR2	21.48			B4	CK-24-2	PR2	21.82			B4	CK-36-2	PR2	20.34			E1	CK-2	PR2	20.87
B5	CK-12-2	PR2	21.49			B5	CK-24-2	PR2	21.87			B5	CK-36-2	PR2	20.32			E2	CK-2	PR2	20.8
B6	CK-12-2	PR2	21.56			B6	CK-24-2	PR2	21.93			B6	CK-36-2	PR2	20.29			E3	CK-2	PR2	20.81
C4	CK-12-3	PR2	23.37			C4	CK-24-3	PR2	19.64			C4	CK-36-3	PR2	20.21			F1	CK-3	PR2	20.38
C5	CK-12-3	PR2	23.51			C5	CK-24-3	PR2	19.71			C5	CK-36-3	PR2	20.45			F2	CK-3	PR2	20.29
C6	CK-12-3	PR2	23.58			C6	CK-24-3	PR2	19.75			C6	CK-36-3	PR2	20.52			F3	CK-3	PR2	20.29
D4	H2S-12-1	PR2	20.79			D4	H2S-24-1	PR2	21.03			D4	H2S-36-1	PR2	17.87			A1	H2S-1	PR2	17.53
D5	H2S-12-1	PR2	20.77			D5	H2S-24-1	PR2	21.05			D5	H2S-36-1	PR2	17.81			A2	H2S-1	PR2	17.4
D6	H2S-12-1	PR2	20.86			D6	H2S-24-1	PR2	21.09			D6	H2S-36-1	PR2	17.86			A3	H2S-1	PR2	17.36
E4	H2S-12-2	PR2	20.61			E4	H2S-24-2	PR2	21.07			E4	H2S-36-2	PR2	18.73			B1	H2S-2	PR2	18.19
E5	H2S-12-2	PR2	20.63			E5	H2S-24-2	PR2	20.86			E5	H2S-36-2	PR2	18.76			B2	H2S-2	PR2	18.17
E6	H2S-12-2	PR2	20.65			E6	H2S-24-2	PR2	20.96			E6	H2S-36-2	PR2	18.81			B3	H2S-2	PR2	18.08
F4	H2S-12-3	PR2	21.01			F4	H2S-24-3	PR2	20.19			F4	H2S-36-3	PR2	19.9			C1	H2S-3	PR2	19.42
F5	H2S-12-3	PR2	21.09			F5	H2S-24-3	PR2	20.07			F5	H2S-36-3	PR2	19.88			C2	H2S-3	PR2	19.43
F6	H2S-12-3	PR2	21.18			F6	H2S-24-3	PR2	20.28			F6	H2S-36-3	PR2	19.94			C3	H2S-3	PR2	19.44
A1	CK-12-1	PR1	22.97			A1	CK-24-1	PR1	20.42			A1	CK-36-1	PR1	18.98			F7	CK-48-1	GAPDH	19.99
A2	CK-12-1	PR1	22.98			A2	CK-24-1	PR1	20.38			A2	CK-36-1	PR1	18.95			F8	CK-48-1	GAPDH	19.22
A3	CK-12-1	PR1	23.05			A3	CK-24-1	PR1	20.33			A3	CK-36-1	PR1	19			F9	CK-48-1	GAPDH	19.4
B1	CK-12-2	PR1	21.95			B1	CK-24-2	PR1	21.82			B1	CK-36-2	PR1	21.04			G7	CK-48-2	GAPDH	19.6
B2	CK-12-2	PR1	21.86			B2	CK-24-2	PR1	21.89			B2	CK-36-2	PR1	21.09			G8	CK-48-2	GAPDH	19.59
B3	CK-12-2	PR1	21.92			B3	CK-24-2	PR1	21.93			B3	CK-36-2	PR1	21.16			G9	CK-48-2	GAPDH	19.53
C1	CK-12-3	PR1	23.91			C1	CK-24-3	PR1	19.99			C1	CK-36-3	PR1	20.58			H7	CK-48-3	GAPDH	20.09
C2	CK-12-3	PR1	23.82			C2	CK-24-3	PR1	19.95			C2	CK-36-3	PR1	20.66			H8	CK-48-3	GAPDH	19.65
C3	CK-12-3	PR1	23.84			C3	CK-24-3	PR1	19.95			C3	CK-36-3	PR1	20.55			H9	CK-48-3	GAPDH	19.85
D1	H2S-12-1	PR1	20.95			D1	H2S-24-1	PR1	21.07			D1	H2S-36-1	PR1	17.53			H4	H2S-48-1	GAPDH	18.94
D2	H2S-12-1	PR1	21.06			D2	H2S-24-1	PR1	21.05			D2	H2S-36-1	PR1	17.48			H5	H2S-48-1	GAPDH	18.9
D3	H2S-12-1	PR1	21.09			D3	H2S-24-1	PR1	21.06			D3	H2S-36-1	PR1	17.53			H6	H2S-48-1	GAPDH	18.95
E1	H2S-12-2	PR1	21.07			E1	H2S-24-2	PR1	21.09			E1	H2S-36-2	PR1	19.51			D7	H2S-48-2	GAPDH	18.8
E2	H2S-12-2	PR1	21.08			E2	H2S-24-2	PR1	21.06			E2	H2S-36-2	PR1	19.53			D8	H2S-48-2	GAPDH	18.72
E3	H2S-12-2	PR1	21.87			E3	H2S-24-2	PR1	21.05			E3	H2S-36-2	PR1	19.55			D9	H2S-48-2	GAPDH	18.73
F1	H2S-12-3	PR1	21.09			F1	H2S-24-3	PR1	20.32			F1	H2S-36-3	PR1	19.22			E7	H2S-48-3	GAPDH	20.43
F2	H2S-12-3	PR1	21.04			F2	H2S-24-3	PR1	20.11			F2	H2S-36-3	PR1	19.21			E8	H2S-48-3	GAPDH	20.37
F3	H2S-12-3	PR1	21.12			F3	H2S-24-3	PR1	20.28			F3	H2S-36-3	PR1	19.19			E9	H2S-48-3	GAPDH	20.37
																		G1	CK-48-1	PR1	20.82
																		G2	CK-48-1	PR1	20.77
																		G3	CK-48-1	PR1	20.68
																		H1	CK-48-2	PR1	21.19
																		H2	CK-48-2	PR1	21.05
																		H3	CK-48-2	PR1	21.2
																		D4	CK-48-3	PR1	21.01
																		D5	CK-48-3	PR1	20.99
																		D6	CK-48-3	PR1	21.12
																		D1	H2S-48-1	PR1	19.07
																		D2	H2S-48-1	PR1	19.04
																		D3	H2S-48-1	PR1	19.13
																		E1	H2S-48-2	PR1	18.42
																		E2	H2S-48-2	PR1	18.28
																		E3	H2S-48-2	PR1	18.38
																		F1	H2S-48-3	PR1	19.77
																		F2	H2S-48-3	PR1	19.66
																		F3	H2S-48-3	PR1	19.76
