# Supplementary material for: Hydrogen sulphide alleviates Fusarium Head Blight in wheat seedlings
Source: PeerJ. 2022 Mar 7;10:e13078. doi: 10.7717/peerj.13078 (PMC8908893; doi:10.7717/peerj.13078)
Supplement: Supplemental Information 8 [file peerj-10-13078-s008.xlsx]

## Sheet: Sheet1
figure 7
Hyphae diameter (mm) 3d
0	25	26	26
0.01	24	24	24
0.075	16	17	15
0.1	8	9	8
0.3	0	0	0
Spore germination (%) 24h
0	100	100	100
0.01	100	100	100
0.075	0.2	0.25	0.19
0.1	1	2	0
0.5	1	1	0
