# Supplementary material for: Hydrogen sulphide alleviates Fusarium Head Blight in wheat seedlings
Source: PeerJ. 2022 Mar 7;10:e13078. doi: 10.7717/peerj.13078 (PMC8908893; doi:10.7717/peerj.13078)
Supplement: Supplemental Information 9 [file peerj-10-13078-s009.xlsx]

## Sheet: Sheet1
Table.1
		Plant height/cm	Root length/cm	Fresh weight/g	Dry weight/g				Plant height/cm	Root length/cm	Fresh weight/g	Dry weight/g				Plant height/cm	Root length/cm	Fresh weight/g	Dry weight/g				Plant height/cm	Root length/cm	Fresh weight/g	Dry weight/g				Plant height/cm	Root length/cm	Fresh weight/g	Dry weight/g
CK	1	12.9	14.6	3.7066	0.46		0.1	1	11	14.3	4.1994	0.4968		0.3	1	13.3	16.7	4.1054	0.5162		0.5	1	12.3	15.3	3.8384	0.5188		1	1	10.9	9.5	3.2679	0.3814
	2	13.2	20					2	12.3	14.2					2	12.2	15.5					2	12.1	15.3					2	11.2	17.2
	3	12	11					3	12.5	15.3					3	13	14.6					3	12	15.3					3	12.5	14.6
	4	11.9	18.5					4	11.5	18.5					4	13.3	13.2					4	12.3	13.3					4	10.6	13
	5	12.6	20.5					5	12.3	14.5					5	12.5	14.9					5	10.5	13.9					5	11	8.5
	6	12.3	18					6	12.2	19.6					6	12.1	12.1					6	12.5	11.5					6	12.2	20.4
	7	12.5	14.3					7	12.5	17.4					7	12.9	17.1					7	11.9	14.2					7	8.7	9.7
	8	13.1	14					8	12.5	17.1					8	11.8	12.7					8	12.8	13.5					8	12.1	12.6
	9	12.5	18					9	18.5	11.5					9	12	16.1					9	11.8	13.7					9	12.3	15.2
	10	11.5	17.3					10	12.5	17.7					10	13.1	14.5					10	11.6	13.3					10	17.4	17.3
	11	11	16					11	11.8	16.1					11	12.6	16					11	11.9	14					11	11.6	9.8
	12	13.3	20					12	12	19.6					12	11	14					12	12.1	14					12	11.8	10.6
	13	11.8	15.5					13	13.4	17.9					13	11.3	18.8					13	12.9	14.2					13	11.5	12.2
	14	11.4	16.3					14	13.5	15.5					14	11.5	16.2					14	11.8	11.9					14	11.6	6.2
	15	12.4	17.5					15	12.5	16.5					15	12.2	16.5					15	11.8	15.9					15	13	13.2
CK	1	12.8	20	3.9606	0.4759		0.1	1	13.5	17.2	3.8672	0.4699		0.3	1	12.9	10	3.8471	0.4919		0.5	1	11.5	14	4.0395	0.5033		1	1	10.6	11.3	3.2956	0.5369
	2	11.1	13.5					2	12.5	16					2	12	17.5					2	11.9	16.9					2	11.2	9.6
	3	11.9	20					3	11.3	15.2					3	14	18					3	12.2	17.5					3	11.5	12.6
	4	12.5	21					4	11.5	15.4					4	11.5	17					4	11.9	10.1					4	11	8.4
	5	11.3	19					5	12.5	15.2					5	13	18.5					5	13.3	11.8					5	10	7.9
	6	10.5	16					6	12.5	16.1					6	12.5	17.6					6	11.8	15.1					6	11.1	13.2
	7	11.5	16					7	12	16					7	12.6	17.6					7	11.8	14.3					7	10.5	9.3
	8	13	19					8	13.3	18					8	11.8	15					8	12.2	14					8	10.6	11.1
	9	12	18.5					9	12.5	17.6					9	13	16.1					9	11.9	14.3					9	11	10.5
	10	12.4	17.4					10	11.9	19.5					10	12.4	18.5					10	11.3	17.8					10	12.1	16.3
	11	10	14.3					11	12.3	17.1					11	12.7	15.9					11	12.4	14.8					11	11.2	10.5
	12	12	18.5					12	12	17.3					12	11	17.6					12	11.3	15.2					12	9.8	10.4
	13	12.3	15.5					13	11.4	16.6					13	14	17.5					13	11.7	14.5					13	10.7	7.3
	14	12.5	16.5					14	12.5	17					14	12.9	16.5					14	12.4	12.5					14	10.1	8.8
	15	11	15.9					15	12	17.7					15	13.6	17					15	11.8	15.9					15	9.2	5.3
CK	1	11.5	16.3	4.0546	0.4796		0.1	1	13.2	17	3.8934	0.5138		0.3	1	12.6	14.5	4.1468	0.4863		0.5	1	12.5	14.5	3.7735	0.4914		1	1	11.4	11.9	3.7611	0.5016
	2	11.5	12					2	12	14.7					2	13	16					2	11.5	15.2					2	11.3	10.6
	3	12	15					3	11.8	16.2					3	12.5	17.5					3	11.7	9.1					3	10.2	6
	4	12.5	16					4	12.7	13.9					4	12.5	16.5					4	12.2	14.3					4	11.5	10.5
	5	13	17					5	11.8	14.2					5	12.5	16.5					5	13.9	12.3					5	9.2	7.6
	6	12.5	13					6	12.5	15.7					6	12.9	16.3					6	11.8	14					6	9.9	8.3
	7	12	15.5					7	12.7	19.2					7	12.3	21.6					7	11.4	12.5					7	10.4	7.5
	8	12.3	15.5					8	12.2	15.3					8	11	16					8	12	15.7					8	12.2	17.4
	9	12.1	21					9	11.8	17					9	12.6	16.5					9	11.5	14.5					9	11.3	14.6
	10	12	14.5					10	13.5	16					10	13.2	20.5					10	12.6	15.4					10	10.7	11.6
	11	12.3	10.9					11	13.2	16.6					11	12.9	18					11	12.4	16.5					11	10.5	13.3
	12	10.9	16.5					12	13	13					12	11	17.5					12	11.6	15.9					12	11.6	13.6
	13	11.7	15.9					13	13.3	14.5					13	12.4	16.9					13	10.4	16.2					13	11	15
	14	12.7	16.9					14	12.5	18.7					14	11	15.1					14	11.5	12.9					14	10	14.8
	15	11.3	16.5					15	14.1	12.9					15	11	15.5					15	11.9	17.1					15	10.2	15.6
Table.2
		Plant height/cm	Root length/cm	Fresh weight/g	Dry weight/g				Plant height/cm	Root length/cm	Fresh weight/g	Dry weight/g				Plant height/cm	Root length/cm	Fresh weight/g	Dry weight/g				Plant height/cm	Root length/cm	Fresh weight/g	Dry weight/g				Plant height/cm	Root length/cm	Fresh weight/g	Dry weight/g
CK	1	12	12.3	4.1047	0.4974		0	1	11.5	16.1	3.9833	0.4379		0.1	1	10.2	8.9	4.3245	0.4635		0.3	1	11.1	14.2	4.442	0.4521		0.5	1	11.2	13.5	4.1322	0.4915
	2	12.8	15.5					2	11	8.5					2	9.8	7.1					2	11.1	12.2					2	11.5	13.7
	3	11.7	10.5					3	11.5	12.9					3	12	8.5					3	11.6	12.7					3	11	12
	4	13	12.3					4	9.4	9.5					4	11.2	10.2					4	11.9	11.8					4	11.4	12
	5	12.5	12.3					5	10.2	11					5	9.5	11					5	11.8	9					5	11.1	13
	6	12.9	12.6					6	10	13					6	11.2	12.3					6	10.8	10.9					6	12.7	13
	7	11.5	12.1					7	8.6	9.6					7	11.8	12.5					7	11.4	11.7					7	10.4	10.5
	8	11.1	13					8	10	10.4					8	11.4	10.2					8	11.9	14.1					8	11.4	11
	9	14.4	15.2					9	9	10.5					9	11.6	11.5					9	10.8	13.5					9	10	11.5
	10	12.8	11.6					10	12.2	12.5					10	10.5	14.1					10	11.6	11.6					10	11.5	12.6
	11	12.9	13.3					11	9.4	15.9					11	11	15					11	11.1	8.1					11	10.9	10.5
	12	11.9	10					12	9.6	11					12	13.5	13.1					12	10.1	11.9					12	9.4	13.5
	13	12.3	12					13	11	11.8					13	10.9	12.9					13	10.5	10.7					13	10.5	8.1
	14	13	14.1					14	8.5	9.7					14	14	10					14	11.4	12.6					14	11.3	9.9
	15	12.8	16.2					15	10	11					15	11.8	10.7					15	12.3	9.8					15	10.1	12.1
CK	1	10.5	15.9	4.427	0.5082		0	1	11.7	15	3.9694	0.4398		0.1	1	10.5	9	4.2046	0.4691		0.3	1	12	11.9	4.0713	0.5063		0.5	1	8.9	11.6	3.9622	0.4423
	2	13.6	13.7					2	11.4	13.4					2	11.8	17.1					2	11.2	13.9					2	11.5	10.9
	3	12.2	15.3					3	8.7	8.7					3	10.7	14.4					3	9.5	12.4					3	8.5	10.1
	4	11.4	10.9					4	10.2	9					4	12.5	12.5					4	10.9	12					4	10.3	12.8
	5	11.6	14.5					5	11.5	12.5					5	10.8	11.2					5	11.7	13.1					5	10.3	9.9
	6	10.5	10.6					6	12	11.1					6	10.3	10.5					6	10.7	13.5					6	10.5	10.5
	7	12.1	11.9					7	9.5	12.5					7	10.7	9.8					7	11.1	10.7					7	11.1	11
	8	12.6	12.5					8	10.4	9.9					8	10.5	15.7					8	11	14.1					8	10.3	10.5
	9	11.6	13.3					9	10.5	8.8					9	10.8	14.1					9	12.7	16					9	11.8	9.2
	10	11.8	9.9					10	11.3	10.2					10	11.6	10.2					10	11.5	15.1					10	11	9.5
	11	12.9	14.9					11	10.8	7.4					11	10.4	8.6					11	11.4	12.9					11	11.5	10.3
	12	13.5	13.1					12	12.9	10.5					12	11.1	10.3					12	12	13.3					12	9	12.3
	13	12.6	13					13	11.5	14.7					13	11	11					13	11.5	12.2					13	10.8	11.9
	14	12.6	11.1					14	12	13.2					14	10.8	11.3					14	11.7	11.5					14	11.4	10.3
	15	12.8	14.4					15	11.3	11.6					15	10.5	14.4					15	10.8	11					15	10.8	11.5
CK	1	11.9	14.3	4.2082	0.4758		0	1	11.4	9.2	3.6019	0.425		0.1	1	12.4	9	4.2172	0.4516		0.3	1	12.2	12.5	4.4632	0.454		0.5	1	11.3	6.5	4.245	0.4925
	2	11.5	15.3					2	10.9	9.5					2	11.5	12					2	12	13.6					2	12	10.3
	3	11.2	9					3	11.1	12.6					3	10.9	13.1					3	11.3	12.9					3	11.7	9
	4	10.9	11.7					4	10.3	9.4					4	11.4	17.2					4	11.6	8					4	11.5	11.2
	5	11.2	11.7					5	10.8	9.4					5	10.4	11.2					5	11.6	10.6					5	11	14
	6	12.1	12					6	11.5	10					6	10.9	12.8					6	11.5	13.1					6	11.5	8.4
	7	12.7	17.3					7	11	10.5					7	10.5	12.7					7	11.6	7.5					7	11.4	13.2
	8	12.7	13.5					8	10.5	8.9					8	11	13.8					8	11.8	11.3					8	12	13
	9	12.2	12.1					9	11	8					9	10.2	13.9					9	10.9	10.7					9	10.2	10.3
	10	11.7	8.5					10	11.8	14.4					10	12.5	15.5					10	10.9	11.4					10	12	14
	11	11.9	13.5					11	11.6	14.7					11	10.5	10.7					11	11.5	11					11	11.3	11
	12	11.1	10.4					12	13	12.4					12	11.5	13.5					12	11.2	8.7					12	10.5	14.5
	13	10.5	10					13	11.4	14.6					13	11.7	14					13	12	10.9					13	10.3	11.1
	14	10.6	10					14	11	13.5					14	11.5	12.9					14	10	11.5					14	11	13.4
	15	12.5	10.8					15	12.2	14.1					15	11.5	13					15	12	13.5					15	10.5	12
